# Supplementary material for: Hourly Wages in Crowdworking: A Meta-Analysis
Source: Springer Nature journal article supplement (doi:10.1007/s12599-022-00769-5), 2022-08-30
Supplement: MOESM1 [file 23439208]

# **Hourly Wages in Crowdfunding: A Meta-Analysis**

**Lars Hornuf, Daniel Vrankar**

Business & Information Systems Engineering (2022)

**Appendix (available online via <http://link.springer.com>)**

## Appendix A: List of Keyword Combination

**Table A1** Keyword combinations

| Base word                  | Addendum      |
|----------------------------|---------------|
| "crowdwork<br>"crowdsource | per hour"     |
|                            | hourly"       |
|                            | wage"         |
|                            | remuneration" |
|                            | earned"       |
|                            | earnings"     |
|                            | pay"          |
|                            | \$"           |
|                            | dollar"       |
|                            | USD"          |
|                            | €"            |
|                            | EUR"          |
|                            | ¥"            |
|                            | yen"          |
|                            | £"            |
| pound"                     |               |
| "Crowdwork<br>"Crowdsource | Entlohnung"   |
|                            | Mindestlohn"  |
|                            | Stundenlohn"  |
|                            | Einkommen"    |
|                            | Vergütung"    |
| Pfund"                     |               |

The base word is combined with the addendum. For example, the first keyword combination we searched for was "crowdwork per hour".
